# Supplementary material for: Low Maternal Microbiota Sharing across Gut, Breast Milk and Vagina, as Revealed by 16S rRNA Gene and Reduced Metagenomic Sequencing
Source: MDPI journal article supplement (doi:10.3390/genes9050231), 2018-05-01
Supplement: s1 [file genes-295934-SI.xlsx]

## Sheet: TableS1
Table S1. List of samples used for the combined 16S rRNA dataset generation.
MotherID	Sampling time point (Pregnancy - 36th gestation week; days - number of days after delivery)			Probiotic Intake
	Breastmilk	Vaginal	Stool
19193	90 days	Pregnancy	Pregnancy/90 days	Placebo
20220	10 days	Pregnancy	Pregnancy	Probiotic
20251	90 days	Pregnancy/Delivery	Pregnancy/90 days	Placebo
20257	10 days	Pregnancy/Delivery	90 days	Placebo
20268	10 days/90 days	Pregnancy	Pregnancy/90 days	Placebo
20292	90 days	Pregnancy	90 days	Placebo
20293	10 days	Pregnancy/Delivery	Pregnancy/90 days	Placebo
20297	10 days/90 days	Pregnancy	Pregnancy	Probiotic
20464	10 days	Pregnancy	Pregnancy/90 days	Placebo
20469	90 days	Pregnancy/Delivery	Pregnancy/90 days	Probiotic
20787	90 days	Pregnancy/Delivery	Pregnancy/90 days	Probiotic
20799	90 days	Pregnancy	Pregnancy	Placebo
20850	10 days/90 days	Delivery	Pregnancy	Placebo
20933	10 days	Pregnancy	90 days	Probiotic
20938	90 days	Pregnancy	Pregnancy/90 days	Placebo
21039	10 days	Pregnancy	Pregnancy/90 days	Probiotic
21050	10 days	Pregnancy/Delivery	Pregnancy/90 days	Probiotic
21286	10 days	Pregnancy/Delivery	90 days	Placebo
21291	90 days	Pregnancy	Pregnancy/90 days	Placebo
21339	10 days	Pregnancy/Delivery	90 days	Placebo
21403	10 days	Pregnancy	Pregnancy/90 days	Probiotic
21557	90 days	Pregnancy	Pregnancy	Probiotic
21574	10 days	Pregnancy	90 days	Placebo
21638	90 days	Delivery	90 days	Probiotic
21646	90 days*	Pregnancy*	90 days	Placebo
21693	10 days	Pregnancy/Delivery	90 days	Probiotic
21777	90 days	Pregnancy/Delivery	Pregnancy/90 days	Probiotic
21821	90 days	Pregnancy	Pregnancy/90 days	Probiotic
21822	90 days	Pregnancy/Delivery	Pregnancy/90 days	Placebo
21825	10 days	Pregnancy	Pregnancy/90 days	Placebo
21834	90 days	Pregnancy	Pregnancy	Probiotic
21835	10 days*/90 days	Delivery	Pregnancy/90 days*	Probiotic
21853	10 days	Pregnancy/Delivery	Pregnancy/90 days	Probiotic
21876	90 days	Pregnancy	90 days	Probiotic
21905	10 days/90 days	Delivery	90 days	Probiotic
21922	90 days*	Pregnancy/Delivery	Pregnancy/90 days	Placebo
21942	90 days	Pregnancy/Delivery	Pregnancy/90 days	Probiotic
22017	10 days/90 days	Pregnancy/Delivery	Pregnancy/90 days	Probiotic
22046	90 days	Pregnancy/Delivery	Pregnancy	Placebo
22049	10 days/90 days	Pregnancy/Delivery	Pregnancy/90 days	Probiotic
22053	90 days	Pregnancy	90 days	Probiotic
22078	10 days/90 days	Delivery	90 days	Placebo
22083	90 days	Pregnancy	90 days	Probiotic
22085	90 days	Delivery	Pregnancy/90 days	Placebo
22095	90 days	Pregnancy	Pregnancy/90 days	Probiotic
22117	10 days	Pregnancy	Pregnancy/90 days	Probiotic
22149	10 days*/90 days	Pregnancy*/Delivery*	Pregnancy	Probiotic
22170	10 days	Delivery	Pregnancy	Placebo
22175	90 days	Pregnancy	Pregnancy/90 days	Placebo
22193	10 days/90 days*	Pregnancy	Pregnancy*/90 days	Placebo
22199	90 days	Pregnancy/Delivery	90 days	Probiotic
22200	90 days	Pregnancy/Delivery	Pregnancy/90 days	Placebo
22208	10 days/90 days	Pregnancy	Pregnancy	Placebo
22239	90 days/90 days	Pregnancy/Delivery	Pregnancy/90 days	Placebo
22242	90 days	Pregnancy	90 days	Placebo
22270	10 days/90 days	Pregnancy	90 days	Placebo
22296	10 days	Delivery	90 days	Placebo
22327	10 days/90 days	Pregnancy	Pregnancy/90 days	Placebo
22341	90 days	Pregnancy	Pregnancy/90 days	Probiotic
22410	90 days	Pregnancy/Delivery	90 days	Probiotic
22419	90 days	Pregnancy	Pregnancy/90 days	Placebo
22434	90 days	Pregnancy	Pregnancy	Placebo
22440	10 days	Pregnancy	Pregnancy/90 days	Probiotic
22470	90 days	Pregnancy/Delivery	90 days	Placebo
22480	90 days	Pregnancy/Delivery	Pregnancy	Placebo
22491	10 days	Pregnancy	90 days	Probiotic
22496	10 days*	Pregnancy	90 days*	Placebo
22512	90 days	Pregnancy*	Pregnancy*	Probiotic
22577	10 days*	Pregnancy*/Delivery*	Pregnancy*/90 days	Probiotic
22589	90 days	Pregnancy	Pregnancy/90 days	Probiotic
22592	90 days	Pregnancy	90 days	Probiotic
22622	90 days	Pregnancy	Pregnancy/90 days	Placebo
22640	90 days	Pregnancy	Pregnancy/90 days	Placebo
22664	90 days	Pregnancy	90 days	Placebo
22670	10 days	Pregnancy/Delivery	Pregnancy/90 days	Placebo
22673	10 days*	Pregnancy	Pregnancy/90 days*	Probiotic
22694	10 days	Pregnancy	Pregnancy	Placebo
22714	90 days	Pregnancy	90 days	Placebo
22724	90 days	Pregnancy	Pregnancy	Placebo
22751	90 days	Pregnancy/Delivery	Pregnancy	Placebo
22764	10 days/90 days	Pregnancy/Delivery	90 days	Probiotic
22767	90 days*	Pregnancy/Delivery*	Pregnancy/90 days	Placebo
22769	10 days	Pregnancy/Delivery	Pregnancy/90 days	Probiotic
22797	90 days	Pregnancy	Pregnancy	Placebo
22808	10 days/90 days	Pregnancy	Pregnancy	Probiotic
22810	10 days	Pregnancy/Delivery	Pregnancy	Placebo
22827	90 days	Pregnancy	Pregnancy/90 days	Placebo
22871	90 days	Pregnancy	90 days	Probiotic
22883	90 days	Delivery	90 days	Placebo
22894	10 days	Pregnancy	90 days	Probiotic
22915	90 days	Pregnancy	Pregnancy	Probiotic
22925	90 days	Pregnancy	Pregnancy/90 days	Placebo
22973	10 days/90 days	Pregnancy	90 days	Placebo
22977	10 days	Pregnancy/Delivery	Pregnancy/90 days	Placebo
23009	10 days	Pregnancy	Pregnancy/90 days	Probiotic
23023	10 days	Pregnancy	Pregnancy/90 days	Probiotic
23074	10 days/90 days	Pregnancy	90 days	Probiotic
23107	10 days*	Pregnancy*	Pregnancy/90 days	Probiotic
23190	90 days	Pregnancy	90 days	Probiotic
23237	10 days/90 days	Pregnancy/Delivery	Pregnancy/90 days	Placebo
23298	10 days	Pregnancy	90 days	Placebo
23334	90 days	Pregnancy	90 days	Probiotic
23362	10 days	Pregnancy	Pregnancy	Probiotic
23396	10 days	Delivery	90 days	Placebo
23457	90 days	Pregnancy	90 days	Probiotic
23474	90 days	Pregnancy	Pregnancy/90 days	Probiotic
23512	90 days	Pregnancy	Pregnancy/90 days	Placebo
23545	10 days	Pregnancy/Delivery	90 days	Probiotic
23726	90 days	Pregnancy/Delivery	90 days	Placebo
*Samples subjected to RMS analysis

## Sheet: TableS2
TableS2. List of women who shared BVS-OTUs across all three sample types
ID	BVS-OTU		Relative amount, %
	Number	RDP taxonomy	Breastmilk	Stool	Vaginal
23107	1	Streptococcus	18.4	0.075	0.0666667
	2	Staphylococcus epidermidis	28.2	0.125	0.466667
	3	Streptococcus	7.3	1.7	0.266667
	56	Faecalibacterium prausnitzii	0.1	6.5	1.36667
22767	1	Streptococcus	45.1	0.025	0.0166667
	5	Streptococcus	1	0.025	0.133333
	7	Haemophilus parainfluenzae	2	1.2	0.0333333
22200	1	Streptococcus	63.4	0.45	0.0333333
	2	Staphylococcus epidermidis	3.7	0.075	0.0333333
	10	Methylobacterium	0.5	0.025	0.0333333
20933	33	Sphingomonas	0.1	0.05	0.0666667
	39		0.3	0.05	0.1
22512	2	Staphylococcus epidermidis	12.8	0.05	0.0333333
	10	Methylobacterium	0.4	0.05	0.0333333
22751	1	Streptococcus	50.9	0.2	0.15
	3	Streptococcus	7.8	3.05	0.0166667
22095	2	Staphylococcus epidermidis	4.2	0.075	0.0333333
	13	Peptoniphilus	0.1	1.35	0.0333333
21403	1	Streptococcus	37	0.025	1.53333
	20	Bifidobacterium longum	0.5	0.275	0.0333333
22149	39		0.1	0.05	0.0166667
22193	33	Sphingomonas	0.35	0.025	0.1
22296	33	Sphingomonas	0.1	0.05	0.0333333
22327	1	Streptococcus	88.4	0.025	0.0333333
22470	1	Streptococcus	32.6	0.05	0.0333333
22577	34	Bifidobacterium	3.3	0.05	41.5833
22810	2	Staphylococcus epidermidis	90.8	0.05	0.0166667
22827	1	Streptococcus	24.8	0.15	0.0333333
22977	1	Streptococcus	52.5	0.025	0.233333
23362	3	Streptococcus	5.1	0.05	0.0666667
23545	1	Streptococcus	32.2	0.1	0.0166667
19193	10	Methylobacterium	0.1	0.025	0.866667
20220	9	Lactobacillus	0.1	2.5	85.2667
20251	38	Anaerococcus	0.7	0.025	0.0333333
20268	2	Staphylococcus epidermidis	5.7	0.5	0.0333333
20469	1	Streptococcus	0.1	0.05	0.0166667
20799	1	Streptococcus	43.3	0.15	0.0333333
20850	2	Staphylococcus epidermidis	34	0.05	0.1
20938	2	Staphylococcus epidermidis	10.9	0.05	0.0666667
21286	1	Streptococcus	80.1	0.05	0.0333333
21777	2	Staphylococcus epidermidis	0.2	0.075	0.0333333
21834	3	Streptococcus	0.1	0.35	0.0333333
21942	2	Staphylococcus epidermidis	1.3	0.05	0.1
22017	3	Streptococcus	3.2	0.1	0.133333
22049	1	Streptococcus	15.75	0.025	0.0166667
22085	1	Streptococcus	71.8	0.025	0.0333333

## Sheet: TableS3
TableS3. List of samples used for the RMS analysis
Sample ID	MotherID	BVS-OTU		Dataset	NCBI BLAST RefSeq_RNA assignment				Relative amount, %
		Number	RDP taxonomy		Best hit	Query coverage, %	E-value	Identity, %
1	22149	5	Streptococcus	breastmilk	Streptococcus agalactiae	98	2*10-163	99	1.2
2				vaginal	Streptococcus agalactiae	98	5*10-164	99	6.5
3									6.73333
4	22808	6	Enhydrobacter	breastmilk	Moraxella osloensis	98	3*10-161	98	2.1
5	22673								1
6				stool	Moraxella osloensis	98	3*10-161	98	0.05
7	21821	15	Veillonella dispar	breastmilk	Veillonella dispar	98	2*10-167	100	2.5
8	21922								1
9				stool	Veillonella dispar	98	1*10-165	99	0.05
10	22629*	26	Bifidobacterium	stool	Bifidobactrium bifidum	99	0	96	2.15
11				vaginal	Bifidobactrium bifidum	99	0	96	0.166667
12	22512	32	Blautia	stool	Blautia faecis	98	0	98	0.7
13	23530								1.3
14	22512			vaginal	Blautia faecis	98	0	98	0.433333
15	23530*								0.2
16	22193	33	Sphingomonas	breastmilk	Sphingomonas dessicabilis	98	0	98	0.7
17				stool	Sphingomonas kyungheensis	98	0	97	0.05
18	22577	34	Bifidobacterium	breastmilk	Bifidobacterium longum subsp. suis	98	0	96	3.3
19				stool	Bifidobacterium breve	98	0	96	0.1
20				vaginal	Bifidobacterium breve	99	0	95	35.3
21									47.8667
22	23107	38	Anaerococcus	breastmilk	Anaerococcus senegalensis	98	0	97	7.3
23				vaginal	Anaerococcus vaginalis	98	0	98	1.36667
24	22767	43	Haemophilus	breastmilk	Haemophilus haemolyticus	98	4*10-165	99	2.3
25				vaginal	Haemophilus haemolyticus	98	8*10-167	99	0.0333333
26	21835	46	Alloiococcus	breastmilk	Dolosigranulum pigrum	99	2*10-163	99	0.1
27				stool	Dolosigranulum pigrum	98	2*10-163	99	0.1
28	22004*	60	Ruminococcaceae	stool	Gemmiger formicilis	98	0	98	49.25
29				stool					39.35
30				vaginal	Gemmiger formicilis	98	0	95	0.566667
31	21646	64	Sneathia	breastmilk	Sneathia sanguinegens	99	0	96	0.2
32				vaginal	Sneathia sanguinegens	99	0	95	9.36667
33	22496	65	Ruminococcaceae	breastmilk	no hit	not available			0.1
34				stool	no hit	not available			4.8
* Mothers had data on only two sample types available, and therefore were not included into the generation of the common 16S rRNA BVS-OTUs

## Sheet: TableS4
Table S4. Number of RMS sequencing reads
Filtering step	Number of reads	Fraction of reads, %
Raw unfiltered data	35659734	100
BBMap filtering	29748650	83.4
NCBI Human Genome filtering	28657029	80.4

## Sheet: TableS5
Table S5. BLAST search of RMS clusters that are shared across all sample types in at least half of the population, against the NCBI RefProk database
RMS cluster	Hit description	Identity, %	E-value	Query coverage, %
Cluster_35	Blautia YL58	100	1e-44	100
Cluster_134	B. breve LMC520	100	1e-44	100
Cluster_175	B. bombi R-54661	100	1e-44	100
Cluster_705	B.longum longum AH1206	100	1e-44	100
Cluster_1003	Bifidobacterium sp. B-13	100	2e-17	0.51
Cluster_3212	B.longum longum AH1206	100	1e-44	100
Cluster_3467	B.longum Su859	100	1e-44	100
Cluster_3770	B.longum strain 35624	100	1e-44	100
Cluster_3875	B.longum Su859	100	1e-44	100
Cluster_3898	B.longum Su859	100	1e-44	100
Cluster_4082	B.longum longum AH1206	100	1e-44	100
Cluster_4352	B.longum longum AH1206	100	1e-44	100
Cluster_4418	B.longum longum AH1206	100	1e-44	100
Cluster_4953	B.longum longum AH1206	100	1e-44	100
Cluster_5124	Erwinia amylovora KRL17	100	1e-44	100
Cluster_5361	B.longum longum AH1206	100	1e-44	100
Cluster_5958	B.longum longum AH1206	100	1e-44	100
Cluster_6442	B.longum longum AH1206	100	1e-44	100
Cluster_6762	B.longum longum AH1206	100	1e-44	100
Cluster_7043	E.coli CH611	100	1e-44	100
Cluster_7410	B.longum longum AH1206	100	1e-44	100
Cluster_7433	E.faecalis V583	100	6e-43	99
Cluster_7711	B.longum longum AH1206	100	1e-44	100
Cluster_7848	E.coli CH611	100	1e-44	100
Cluster_7945	B.longum longum AH1206	100	1e-44	100
Cluster_8050	B.longum Su859	100	1e-44	100
Cluster_8583	B.longum longum AH1206	100	1e-44	100
Cluster_9182	B.longum longum AH1206	100	1e-44	100
Cluster_9375	B.longum longum AH1206	100	1e-44	100
Cluster_11079	B.longum longum AH1206	100	1e-44	100
Cluster_11782	B.longum longum AH1206	100	1e-44	100
Cluster_12092	B.longum longum CCUG30698	100	1e-44	100
Cluster_12779	B.longum infantis CECT7210	100	1e-44	100
Cluster_12796	B.longum longum AH1206	100	1e-44	100
Cluster_12876	B.longum longum CCUG30698	100	1e-44	100
Cluster_14015	B.longum longum AH1206	100	1e-44	100
Cluster_14046	B.longum longum AH1206	100	1e-44	100
Cluster_14385	B.longum Su859	100	1e-44	100
Cluster_15416	B.longum Su859	100	1e-44	100
Cluster_15436	B.longum Su859	100	3e-21	58
Cluster_16166	B. longum 35624	100	1e-44	100
Cluster_17932	B.longum longum AH1206	100	1e-32	78
Cluster_18037	B.longum BG7	100	1e-44	100
Cluster_19299	B. longum JCM1217	100	1e-44	100
Cluster_19441	B. longum 35624	100	1e-38	89
Cluster_19696	B.longum longum AH1206	100	1e-44	100
Cluster_23080	B.longum longum CCUG30698	100	1e-44	100
Cluster_25451	B. longum 35624	100	1e-44	100
Cluster_26088	B.longum longum AH1206	100	1e-44	100
Cluster_26219	B.longum longum CCUG30698	100	1e-44	100
Cluster_26956	B. longum JCM1217	100	1e-44	100
Cluster_29061	B. longum JCM1217	100	1e-44	100
Cluster_30930	E. faecalis KB1	100	1e-44	100
Cluster_45261	Enterococcus mundtii Tw278	100	4e-32	77
Cluster_54675	E.faecalis plasmid	100	1e-44	100
Cluster_57400	E. faecalis KB1	100	1e-44	100
Cluster_60001	E.faecalis V583	100	1e-44	100
Cluster_67344	E. faecalis L12	100	1e-44	100
Cluster_67671	E. faecalis KB1	100	1e-44	100
Cluster_70444	E.coli CH611	100	1e-44	100
Cluster_70931	E. faecalis KB1	100	1e-44	100
Cluster_72891	E. faecalis KB1	100	1e-44	100
Cluster_85745	B. longum 35624	100	1e-44	100
Cluster_85880	E. faecalis KB1	100	1e-44	100
Cluster_91032	E.faecalis CLB21560	100	1e-44	100
Cluster_92411	E. faecalis KB1	100	1e-44	100
Cluster_95251	E. faecalis KB1	100	1e-44	100
Cluster_98041	E. faecalis KB1	100	1e-44	100
Cluster_98819	E.faecalis V583	100	1e-44	100
Cluster_109897	E.faecalis V583	100	1e-44	100
Cluster_113550	E. faecalis KB1	100	1e-44	100
Cluster_114640	E.faecalis AMB05	100	1e-44	100
Cluster_116382	E.faecalis V583	100	1e-44	100
Cluster_117441	E.faecalis CLB21560	100	1e-44	100
Cluster_119799	E.faecalis V583	100	1e-44	100
Cluster_136111	E. faecalis KB1	100	1e-44	100
Cluster_145622	E.faecalis CLB21560	100	1e-44	100
Cluster_149351	E.coli UPEC 26-1	100	1e-44	100
Cluster_153555	E.faecalis D32	100	1e-44	100
Cluster_164985	E. faecalis KB1	100	1e-44	100
Cluster_174289	E.faecalis V583	100	1e-44	100
Cluster_185053	E.faecalis LD33	100	6e-30	74
Cluster_212707	B.longum Su859	99	1e-38	92
Cluster_223120	E. faecalis KB1	100	1e-44	100
Cluster_346415	B.longum 35624	99	6e-43	100
Cluster_721557	Enterococcus mundtii Tw278	99	6e-43	100

## Sheet: TableS6
TableS6. E. faecalis and B. longum shared across breastmilk, stool and vaginal swabs of individuals
ID	Sample Type	Sample Type	Number of RMS clusters that are shared across the samples
			E.faecalis		B.longum
			Rank among all shared	Number of RMS clusters	Rank among all shared	Number of RMS clusters
22673	breastmilk	stool	1	217	4	98
21835	breastmilk	stool	2	153	3	147
22496	breastmilk	stool	9	88	5	154
21922	breastmilk	stool	1	90	4	47
22149	breastmilk	vaginal	8	317	21	34
23107	breastmilk	vaginal	6	138	7	134
22767	breastmilk	vaginal	11	161	14	86
21646	breastmilk	vaginal	13	64	18	23
22193	breastmilk	stool	2	6	10	5
22512	vaginal	stool	2	67	4	32
22629	vaginal	stool	5	104	25	18
23530	vaginal	stool	10	25	5	108
22004	vaginal	stool	3	74	2	88

## Sheet: TableS7
Table S7. List of HMP bacterial species that RMS reads mapped towards
Species	Prevalence, %	Number of mapped RMS reads
		Mean	SD
Alistipes putredinis	85.2941	902.559	1838.14
Alistipes shahii	85.2941	817.412	1893.37
Anaerostipes hadrus	79.4118	594.412	1634.65
Bacteroides caccae	79.4118	7729.68	38626.2
Bacteroides cellulosilyticus	70.5882	1602.65	5077.77
Bacteroides dorei	97.0588	5332	14188.4
Bacteroides ovatus	88.2353	2680.41	9384.23
Bacteroides sp.	100	22265.8	45691.6
Bacteroides uniformis	85.2941	1393.06	3510.97
Bacteroides vulgatus	82.3529	1364.79	4331.81
Bacteroides xylanisolvens	70.5882	872.971	2941.47
Barnesiella intestinihominis	82.3529	1297.38	3167.7
Bifidobacterium adolescentis	76.4706	1017.44	2338.59
Bifidobacterium bifidum	61.7647	154.5	615.835
Bifidobacterium breve	94.1176	141.824	421.712
Bifidobacterium longum subsp. infantis	100	157.706	261.272
Bifidobacterium longum subsp. longum	100	464.382	992.349
Bifidobacterium sp.	73.5294	33.9118	86.1125
Clostridium sp.	73.5294	749.235	1366.68
Coprococcus comes	94.1176	2071.53	4122.41
Dialister invisus	85.2941	1143.94	2514.23
Dorea formicigenerans	91.1765	2122.15	3905
Dorea longicatena	91.1765	2814.97	6165.09
Enterococcus faecalis	100	259.647	210.714
Enterococcus faecium	85.2941	3.14706	3.34965
Escherichia coli	85.2941	410.176	1217.32
Eubacterium rectale	97.0588	4754.85	11909.2
Faecalibacterium prausnitzii	79.4118	1033.44	2105.61
Lachnospiraceae bacterium	100	5447.26	10333.9
Parabacteroides merdae	85.2941	1468.5	4490.59
Parabacteroides sp.	88.2353	713.559	1527.51
Propionibacterium acnes	73.5294	13.0588	24.0201
Roseburia intestinalis	85.2941	820.029	1749.64
Roseburia inulinivorans	79.4118	849.324	2394.91
Ruminococcus bromii	79.4118	4401.38	15724.6
Ruminococcus obeum	85.2941	7231.53	25564.9
Ruminococcus sp.	88.2353	4261.74	8579.69
Ruminococcus torques	94.1176	1873.76	3359.39
Subdoligranulum sp.	67.6471	417.382	1042.18
Tyzzerella nexilis	91.1765	162.971	284.828
[Eubacterium] hallii	82.3529	3460.06	9078.19
[Eubacterium] siraeum	70.5882	1656.71	5579.68

## Sheet: TableS8
TableS8. Correlation between 16S rRNA prediction and RMS detection. RMS reads mapping towards target species
Target taxon	motherID	sample type	RMS reads with > 80 bp mapping to target genomes
			Number of target sites	Mean coverage	Mean identity, %
Moraxella osloensis	22808	breast milk	10	63.1952	92.6499
	22673	breast milk	204	22.8858	96.5044
		stool	21	278.365	96.3953
Streptococcus agalactiae	22149	breast milk	8	1243.42	85.6166
		vaginal swab	17	611.821	84.7411
		vaginal swab	35	1517.46	86.7662
Dolosigranulum pigrum	21835	breast milk	26	5954.84	87.324
		stool	19	394.652	94.6009
Bifidobacterium breve	22577	breast milk	48	191.264	91.0872
		stool	328	39.3327	97.2793
		vaginal swab	228	911.325	95.8121
		vaginal swab	236	120.439	98.0048
Anaerococcus vaginalis	23107	breast milk	10	19308.2	74.8778
		vaginal swab	35	177.33	96.5443
Veillonella dispar	21821	breast milk	77	2846.6	88.5154
	21922	breast milk	46	2.52887	96.6179
		stool	382	21.1195	96.2135
Bifidobacterium bifidum	22629	stool	184	11.6519	97.3006
		vaginal swab	33	511.356	90.8321

## Sheet: TableS9
TableS9. List of Streptococcus species genomes used for mapping of raw RMS reads; downloaded from NCBI Genome database
Accession number	Description
NZ_KE136522.1	Enterococcus saccharolyticus subsp. saccharolyticus ATCC 43076 acyDA-supercont2.1, whole genome shotgun sequence
AE009948.1	Streptococcus agalactiae 2603V/R, complete genome
NC_022239.1	Streptococcus anginosus C238, complete genome
NZ_GL636091.1	Streptococcus australis ATCC 700641 SCAFFOLD1, whole genome shotgun sequence
NC_022238.1	Streptococcus constellatus subsp. pharyngis C1050, complete genome
NC_019042.1	Streptococcus dysgalactiae subsp. equisimilis AC-2713, complete genome
NC_017576.1	Streptococcus gallolyticus subsp. gallolyticus ATCC 43143 DNA, complete genome
CP000725.1	Streptococcus gordonii str. Challis substr. CH1, complete genome
NZ_ATVP01000001.1	Streptococcus hyovaginalis DSM 12219 G574DRAFT_scaffold00001.1_C, whole genome shotgun sequence
NZ_GL732439.1	Streptococcus infantis ATCC 700779 SCAFFOLD1, whole genome shotgun sequence
NC_022246.1	Streptococcus intermedius B196, complete genome
NC_013853.1	Streptococcus mitis B6, complete genome
NC_004350.2	Streptococcus mutans UA159 chromosome, complete genome
NC_015291.1	Streptococcus oralis Uo5 complete genome sequence
NC_015678.1	Streptococcus parasanguinis ATCC 15912, complete genome
AE007317.1	Streptococcus pneumoniae R6, complete genome
NC_015875.1	Streptococcus pseudopneumoniae IS7493, complete genome
NC_002737.2	Streptococcus pyogenes M1 GAS, complete genome
NZ_AJTZ01000001.1	Streptococcus ratti FA-1 = DSM 20564 strain FA-1 contig1, whole genome shotgun sequence
NZ_CP009913.1	Streptococcus salivarius strain NCTC 8618, complete genome
NC_009009.1	Streptococcus sanguinis SK36 chromosome, complete genome
NC_012926.1	Streptococcus suis BM407 chromosome, complete genome
NC_017581.1	Streptococcus thermophilus JIM 8232 complete genome
NZ_AEUZ02000001.1	Streptococcus urinalis 2285-97 final_molecule, whole genome shotgun sequence

## Sheet: TableS10
Table S10. BLAST search of negative control reads against the NCBI Reference Prokaryotic RefProk database
Species	Number of hits	Average
		length, bp	identity, %	E-value
Enterococcus faecalis	736	94.4955	99.467	2.25986e-19
Mycobacterium malmesburyense	184	102.989	99.8154	5.43478e-35
Sanguibacteroides justesenii	103	101.674	94.8505	2.28574e-14
Paeniglutamicibacter antarcticus	78	96.6726	94.088	2.30559e-16
Mesorhizobium plurifarium,	73	61.9726	94.2648	1.3814e-08
Bifidobacterium longum	47	100.449	98.6816	2.04205e-18
Escherichia coli	47	100.958	99.0367	1.58333e-25
Planktothrix tepida	40	63.1	94.064	1.7022e-07
Micrococcus lylae	39	63.4103	93.8597	3.07803e-08
Roseburia faecis	30	96.9	98.4607	8.6669e-21
Alcanivorax hongdengensis	29	97.8333	96.5903	1.6674e-17
Bacteroides vulgatus	25	94.28	97.4344	8.00152e-16
Bacteroides uniformis	24	99.8333	98.8883	2.5e-26
Nocardia brevicatena	23	94.087	91.1191	3.75217e-16
[Eubacterium] rectale	22	98.4091	98.2677	1.36365e-19
Bacteroides fragilis	17	102.941	99.6576	2.35687e-42
Collinsella ihuae	14	60.2857	94.9257	7.18643e-09
Bacteroides cellulosilyticus	13	99.3077	99.1754	1.53846e-25
Bacteroides ovatus	12	97.6667	97.0975	1.83502e-30
Bifidobacterium adolescentis	12	97	99.0292	6.66667e-27
Bifidobacterium breve	8	99.375	97.3987	8.8e-25
Enterococcus pseudoavium	8	103	99.6362	7.75e-45
Roseburia intestinalis	8	97.25	99.3937	2.5e-21
Ruminococcus bicirculans	8	81.1	99.062	3.12e-19
Bacteroides thetaiotaomicron	7	103	98.1971	1.42857e-33
Barnesiella intestinihominis	7	89.8571	98.4214	7.18571e-17
Colwellia marinimaniae	7	83	89.0243	8.57152e-11
Inquilinus limosus	7	96	87.6386	1.14286e-09
Bifidobacterium saguini	6	91.3333	99.59	3.33333e-26
Dialister invisus	6	100.429	98.0586	1.42914e-33
Enterococcus thailandicus	6	102.5	99.6717	1.536e-43
Roseburia inulinivorans	6	99	99.3533	1.66667e-33
Bifidobacterium commune	5	103	99.806	4.32e-45
Bifidobacterium lemurum	5	103	99.806	4.32e-45
Thioflexothrix psekupsii	5	91.6	95.484	8e-18
Alistipes putredinis	4	103	97.5725	2.5e-33
Alistipes shahii	4	100.75	96.37	5e-26
Mediterranea massiliensis	4	90.75	99.5125	5e-33
Oceanospirillum linum	4	92.5	85.045	5.01e-10
Salinicoccus carnicancri	4	79	99.365	2.05e-31
Streptomyces cinnamoneus	4	103	100	4e-46
Alistipes inops	3	101.333	98.02	3.00003e-38
Bacteroides salyersiae	3	103	99.6767	6.93333e-45
Bifidobacterium reuteri	3	69.6667	98.7067	2e-18
Gemmata obscuriglobus	3	91.3333	91.1733	1.33333e-12
Hoeflea olei	3	92.3333	85.36	2.66733e-14
Kurthia massiliensis	3	70	91.37	6.7e-15
Lactobacillus rogosae	3	75.6667	98.68	1.66667e-21
Mycobacterium houstonense	3	73.6667	87.6967	1.33334e-07
Tetrasphaera japonica	3	77.6667	88.22	2.03333e-10
[Clostridium] citroniae	3	96	91.8933	1.7e-21
[Eubacterium] eligens	3	86.5714	99.7229	2.14286e-33
Acetivibrio ethanolgignens	2	103	100	4e-46
Blautia obeum	2	103	99.515	1.02e-44
Butyrivibrio crossotus	2	102	98.02	1.5e-38
Coprococcus comes	2	103	98.06	2.001e-41
Dorea formicigenerans	2	103	99.515	1.02e-44
Dorea longicatena	2	86.5	100	1e-29
Intestinibacter bartlettii	2	77.5	100	1.5e-22
Mycobacterium noviomagense	2	95	95.785	5e-32
Mycobacterium shimoidei	2	78.5	97.575	4e-19
Tyzzerella nexilis	2	103	99.03	2e-44
Alistipes finegoldii	1	103	93.2	2e-34
Alistipes ihumii	1	103	99.03	2e-44
Alistipes senegalensis	1	103	100	4e-46
Anaerostipes hadrus	1	103	100	4e-46
Anaerotignum lactatifermentans	1	102	100	2e-45
Bacteroides caccae	1	103	98.06	9e-43
Bacteroides faecichinchillae	1	60	100	3e-22
Bacteroides plebeius	1	103	96.12	2e-39
Bacteroides pyogenes	1	82.5	98.71	5e-22
Bacteroides stercoris	1	103	100	4e-46
Bifidobacterium bifidum	1	103	98.06	9e-43
Bifidobacterium scardovii	1	71	87.32	3e-13
Bifidobacterium tsurumiense	1	95	98.95	6e-40
Blautia hydrogenotrophica	1	103	98.06	9e-43
Brachybacterium muris	1	64	90.62	1e-12
Christensenella timonensis	1	92	100	6e-40
Clostridium cadaveris	1	103	100	4e-46
Clostridium disporicum	1	103	100	4e-46
Clostridium paraputrificum	1	99	86.87	3e-22
Eubacterium plexicaudatum	1	103	99.03	2e-44
Eubacterium ramulus	1	103	100	4e-46
Eubacterium ventriosum	1	103	98.06	9e-43
Faecalibacterium prausnitzii	1	103	100	4e-46
Holdemania massiliensis	1	72	98.61	3e-27
Lachnobacterium bovis	1	103	99.03	2e-44
Lactobacillus delbrueckii	1	73	98.63	1e-27
Lactobacillus hamsteri	1	93	82.8	8e-14
Microbacterium barkeri	1	103	100	4e-46
Parabacteroides johnsonii	1	103	94.17	4e-36
Pelobacter carbinolicus	1	65	93.85	3e-18
Peptoniphilus lacrimalis	1	99	84.85	3e-18
Rhodococcus kyotonensis	1	103	99.03	2e-44
Riemerella columbipharyngis	1	93	88.17	1e-21
Romboutsia timonensis	1	74	98.65	3e-28
Roseburia hominis	1	87	99.44	2.5e-36
Ruthenibacterium lactatiformans	1	103	98.06	9e-43
Sporobacter termitidis	1	103	97.09	4e-41
Stenotrophomonas panacihumi	1	102	91.18	2e-30
Streptomyces auratus	1	103	100	4e-46
Subdoligranulum variabile	1	103	97.575	2.045e-41
Tatumella saanichensis	1	94	85.11	1e-17
Trueperella pyogenes	1	103	88.35	4e-26
Xenorhabdus innexi	1	103	100	4e-46
[Clostridium] leptum	1	103	97.09	4e-41
[Clostridium] spiroforme	1	95	88.42	1e-22
[Eubacterium] hallii	1	103	92.23	1e-32

[truncated: 3 more sheets: TableS11, TableS12, TableS13]
