# Supplementary material for: Low Maternal Microbiota Sharing across Gut, Breast Milk and Vagina, as Revealed by 16S rRNA Gene and Reduced Metagenomic Sequencing
Source: MDPI journal article supplement (doi:10.3390/genes9050231), 2018-05-01
Supplement: s1 [file s1]

## Supplementary Figures

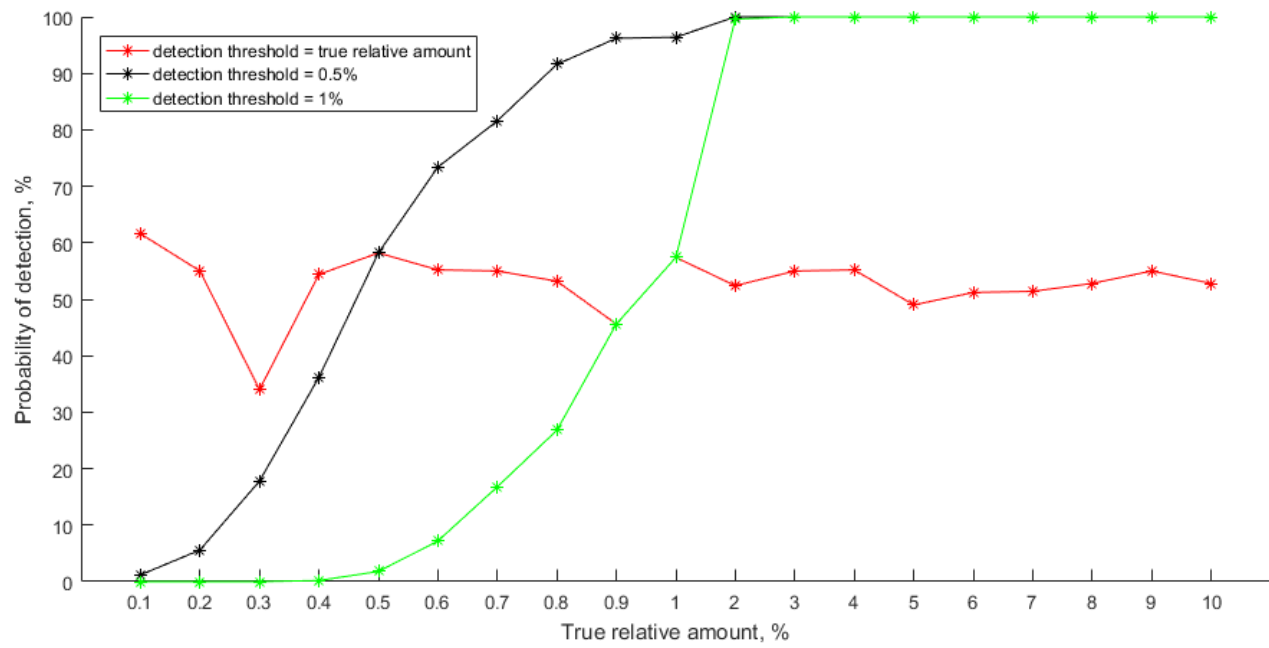

**Figure S1.** Probability of OTU to exceed a given detection threshold given its true relative amount; sequencing depth is set to 1000 sequences per sample. Probability of detection above the set threshold is calculated based on 500 random permutations.

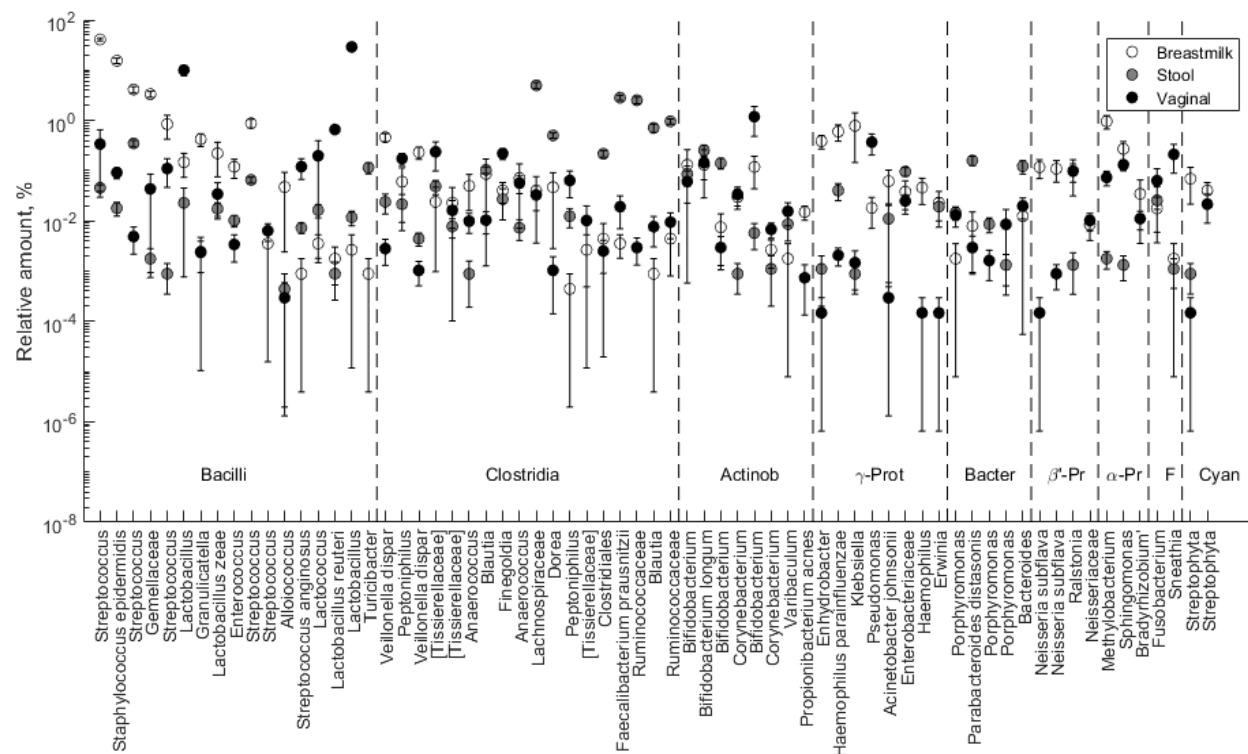

**Figure S2.** Relative amount of BVS-OTUs in breast milk, stool and vaginal swab samples (Actinob – Actinobacteria;  $\gamma$ -Prot – Gammaproteobacteria; Bacter – Bacteroidia;  $\beta$ -Pr – Betaproteobacteria;  $\alpha$ -Pr – Alphaproteobacteria; F – Fusobacteria; Cyan – Cyanobacteria)

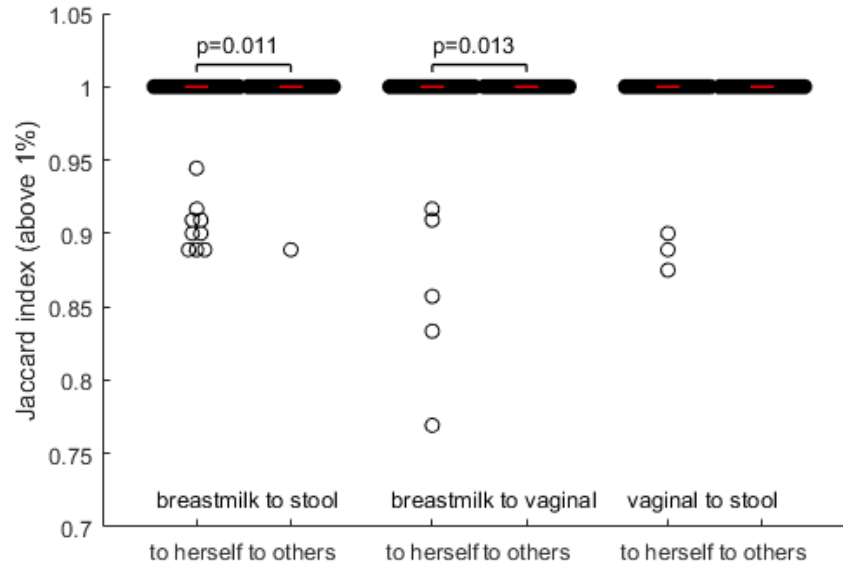

**Figure S3.** Jaccard index of dissimilarity between vaginal, breastmilk and stool samples. Jaccard index ranges from 0 (identical) to 1 (completely different) and is calculated based on the proportion of common taxa detected between pairs of samples. To herself: intraindividual dissimilarity; to others: interindividual dissimilarity. Median values, as well as 25<sup>th</sup> and 75<sup>th</sup> percentile, are depicted in red.

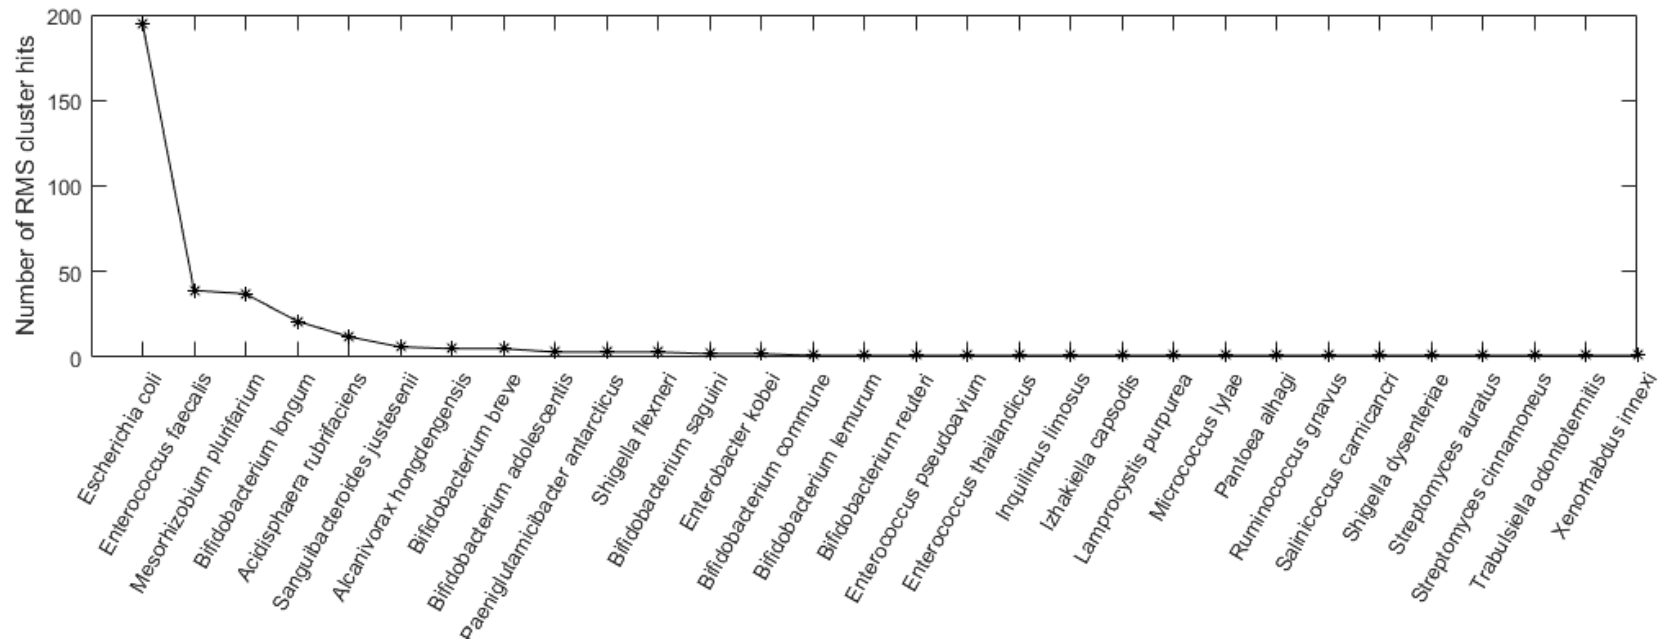

**Figure S4.** Taxonomic distribution of 405 RMS clusters shared across breastmilk, stool and vaginal swab samples of one individual

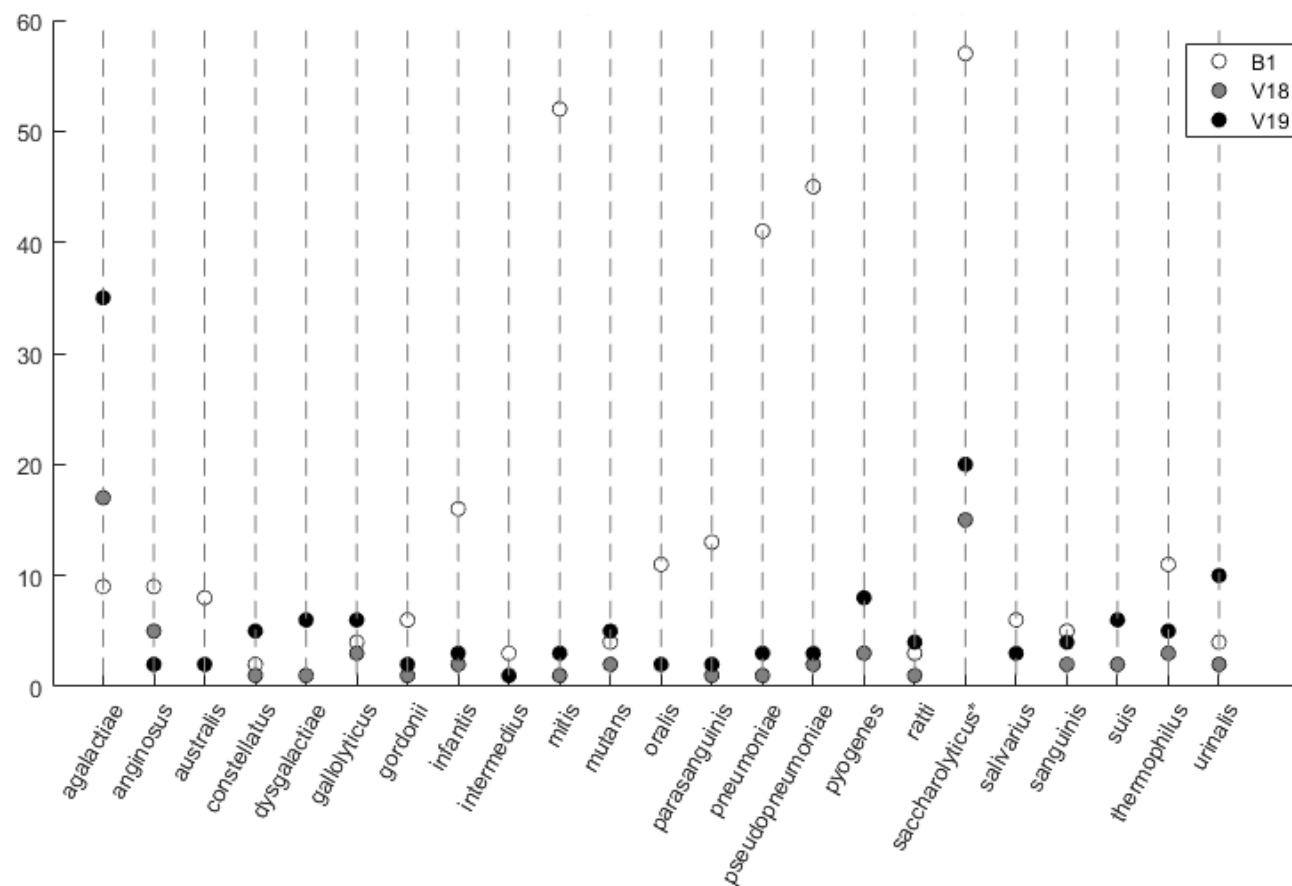

**Figure S5.** Number of regions in *Streptococcus* target genomes that are covered by raw RMS reads from samples of the woman in who *Streptococcus* BVS-OTU was detected based on the 16S rRNA data. B1 – breastmilk sample; V18 and V19 – vaginal swab samples.

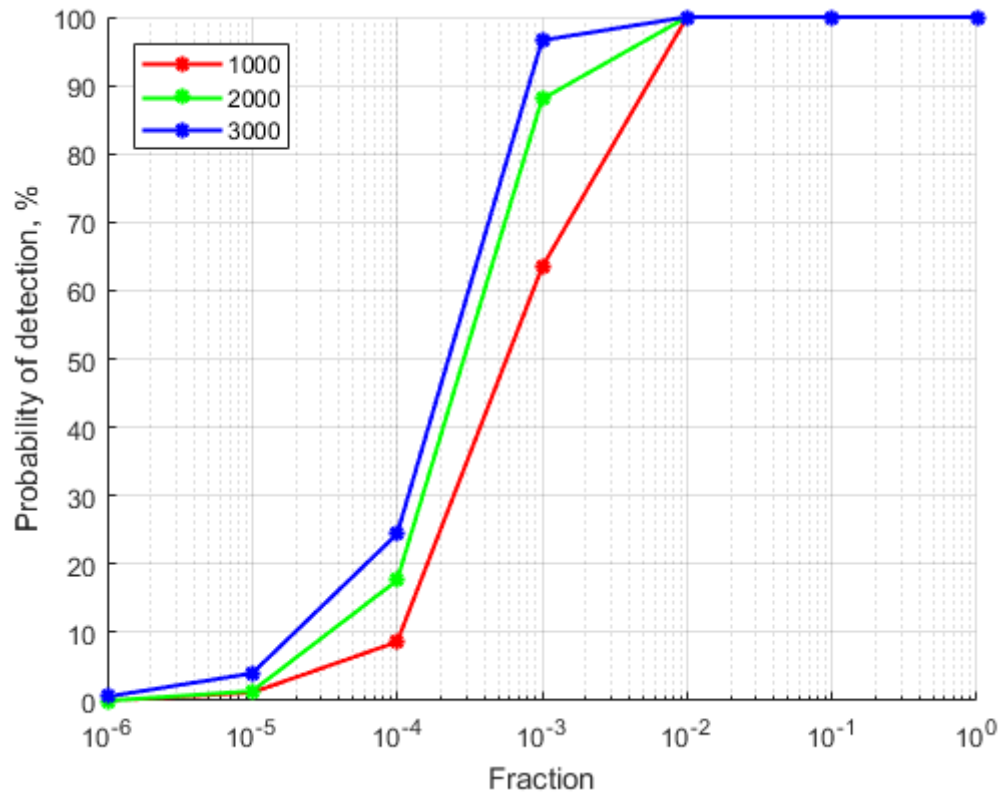

**Figure S6.** Probability of detecting a single read from a taxon using a given rarefaction level and its true fraction in the community. Probability is calculated based on 500 random permutations.

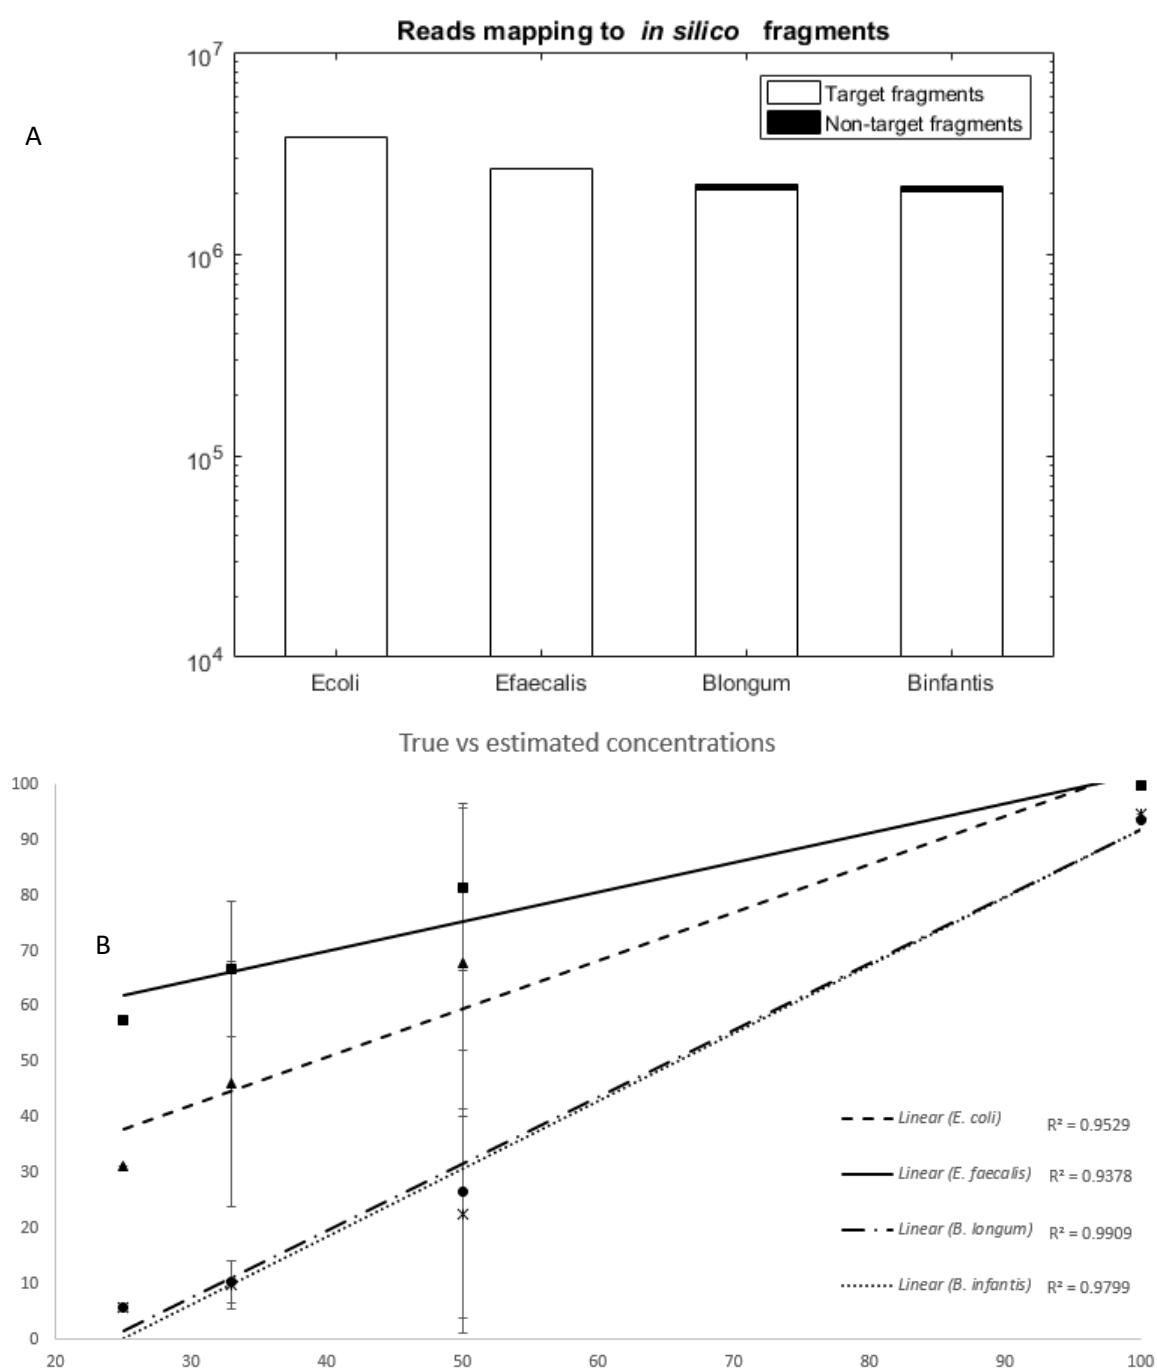

**Figure S7.** Verification of RMS analysis. **(A)** Number of RMS reads mapping towards *in silico* generated RMS clusters from target species. **(B)** Correlation between 'true' and 'estimated' target bacteria concentrations
